# Supplementary material for: Solid Lipid Nanoparticles for Dibucaine Sustained Release
Source: PubMed Central journal article supplement (PMC6321380; doi:10.3390/pharmaceutics10040231), 2018-11-14
Supplement: pharmaceutics-10-00231-s001.pdf [file pharmaceutics-10-00231-s001.pdf]

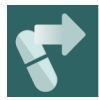

# Supplementary Materials: Solid Lipid Nanoparticles for Dibucaine Sustained Release

Raquel de M. Barbosa, Ligia N.M. Ribeiro, Bruna R. Casadei, Camila M. G. da Silva, Viviane A. Queiróz, Nelson Duran, Daniele R. de Araújo, Patrícia Severino and Eneida de Paula <sup>1</sup>

**Table S1.** Melting points and enthalpies ( $\Delta H$ ) obtained for the SLN formulations prepared by H-P, and their components, measured by differential scanning calorimetry.

| Samples                   | Melting Point (°C) | $\Delta H$ (J/g) |
|---------------------------|--------------------|------------------|
| DBC                       | 66.7               | -94.3            |
| Pluronic F68              | 54.6               | -145.6           |
| Myristyl myristate        | 39.3               | -179.5           |
| Cetyl palmitate           | 53.7               | -212.1           |
| SLN <sub>MM</sub> /H-P    | 39.8               | -65.6            |
| SLN <sub>MM</sub> DBC/H-P | 37.4               | -69.3            |
| SLN <sub>CP</sub> /H-P    | 53.4               | -66.7            |
| SLN <sub>CP</sub> DBC/H-P | 53.1               | -65.4            |
